# Supplementary material
Source: Springer Nature journal article supplement (https://www.springermedizin.de/resource/supplementary/12889_2009_2129_MOESM1_ESM.pdf/9484660)
Supplement: MOESM1 [file 9484660]

**All participants**

**n=212**

**Got NVP during ANC**

**n=178 (92.7%)**

**Did not get NVP during ANC**

**n=34 (7.3%)**

**Swallowed the NVP**

**n=162 (91.0%)**

**Did not swallow the NVP**

**n=16 (9.0%)**

**Swallowed NVP before delivery**

**n=14 (41.2%)**

**Did not swallow NVP**

**n=20 (58.8%)**

**Swallowed the NVP >2hrs before delivery**

**n=143 (88.3%)**

**Swallowed the NVP <2hrs before delivery**

**n=19 (11.7%)**

**Swallowed the NVP >2hrs before delivery**

**n=4 (28.6%)**

**Swallowed the NVP <2hrs before delivery**

**n=10 (71.4%)**
